# Supplementary material for: The lumbar multifidus is characterised by larger type I muscle fibres compared to the erector spinae
Source: PubMed Central journal article supplement — Anat Cell Biol. 2020 Jun 30;53(2):143–50. doi: 10.5115/acb.20.009 (PMC7343561; doi:10.5115/acb.20.009), 2020-06-30
Supplement: ACB-53-143_Appendix.pdf [file ACB-53-143_Appendix.pdf]

**Appendix Table 1.** Reliability of the muscle fiber typing and morphometry measurements

| Fiber type                        | Mean±SD           | ICC   | SEM    | %SEM  |
|-----------------------------------|-------------------|-------|--------|-------|
| Type I CSA ( $\mu\text{m}^2$ )    | 6,080.83±1,586.72 | 0.983 | 206.88 | 3.40  |
| Type IIa CSA ( $\mu\text{m}^2$ )  | 4,958.48±1,437.88 | 0.955 | 305.02 | 6.15  |
| Type IIax CSA ( $\mu\text{m}^2$ ) | 4,192.45±1,813.80 | 0.894 | 590.53 | 14.09 |
| Type IIx CSA ( $\mu\text{m}^2$ )  | 3,948.95±1,488.55 | 0.862 | 552.97 | 14.00 |
| Type I (%)                        | 55.63±13.95       | 0.976 | 2.16   | 3.88  |
| Type IIa (%)                      | 20.79±7.88        | 0.961 | 1.56   | 7.50  |
| Type IIax (%)                     | 9.67±9.95         | 0.907 | 3.03   | 31.33 |
| Type IIx (%)                      | 13.89±11.03       | 0.919 | 3.08   | 22.17 |

ICC, intraclass correlation coefficient; SEM, standard error of measurement; CSA, cross-sectional area. ICC and SEM of muscle fiber CSA and percentage in the erector spinae of the first 10 included subjects.

**Appendix Table 2.** Reliability of the muscle fiber typing and morphometry measurements

| Fiber type                        | Mean±SD           | ICC   | SEM    | %SEM  |
|-----------------------------------|-------------------|-------|--------|-------|
| Type I CSA ( $\mu\text{m}^2$ )    | 7,441.85±2,224.96 | 0.996 | 140.72 | 1.89  |
| Type IIa CSA ( $\mu\text{m}^2$ )  | 5,127.48±1,853.11 | 0.988 | 203.00 | 3.96  |
| Type IIax CSA ( $\mu\text{m}^2$ ) | 3,630.72±1,329.56 | 0.911 | 396.65 | 10.92 |
| Type IIx CSA ( $\mu\text{m}^2$ )  | 3,535.81±1,327.68 | 0.975 | 209.92 | 5.94  |
| Type I (%)                        | 51.71±12.66       | 0.966 | 2.33   | 4.51  |
| Type IIa (%)                      | 20.13±7.73        | 0.849 | 3.00   | 14.90 |
| Type IIax (%)                     | 9.87±6.10         | 0.591 | 3.71   | 37.59 |
| Type IIx (%)                      | 18.28±12.69       | 0.959 | 2.36   | 12.91 |

ICC, intraclass correlation coefficient; SEM, standard error of measurement; CSA, cross-sectional area. ICC and SEM of muscle fiber CSA and percentage in the multifidus muscle of the first 10 included subjects.

**Appendix Table 3.** Fiber type CSA, percentage and RCSA of the right lumbar ES and lumbar MF

| Fiber type                          | CSA ES          | CSA MF          | P-value |
|-------------------------------------|-----------------|-----------------|---------|
| Type I (CSA) ( $\mu\text{m}^2$ )    | 6,279.48±340.66 | 7,439.31±444.59 | 0.0053  |
| Type IIa (CSA) ( $\mu\text{m}^2$ )  | 5,288.13±327.69 | 5,475.71±509.30 | 0.6521  |
| Type IIax (CSA) ( $\mu\text{m}^2$ ) | 4,715.31±433.28 | 4,054.29±362.62 | 0.2758  |
| Type IIx (CSA) ( $\mu\text{m}^2$ )  | 4,065.81±392.76 | 3,818.05±266.45 | 0.6384  |
| Type I (%)                          | 57.74±3.76      | 59.07±3.63      | 0.3717  |
| Type IIa (%)                        | 23.32±2.12      | 22.45±1.95      | 0.8675  |
| Type IIax (%)                       | 8.65±2.19       | 9.21±1.76       | 0.7130  |
| Type IIx (%)                        | 15.43±2.49      | 13.89±2.97      | 0.3534  |
| Type I (RCSA) (%)                   | 63.54±3.07      | 68.8±2.82       | 0.3717  |
| Type IIa (RCSA) (%)                 | 21.60±1.99      | 19.17±1.82      | 0.4802  |
| Type IIax (RCSA) (%)                | 7.23±1.99       | 5.93±1.14       | 0.7501  |
| Type IIx (RCSA) (%)                 | 11.8±2.20       | 9.14±2.24       | 0.2052  |

Values are presented as mean±SD. CSA, cross-sectional area; RCSA, relative cross-sectional area; ES, erector spinae; MF, multifidus.
